# Supplementary material for: Efficacy, Convenience, Safety and Durability of DTG-Based Antiretroviral Therapies: Evidence from a Prospective Study by the Italian MaSTER Cohort
Source: MDPI journal article supplement (doi:10.3390/v15040924), 2023-04-06
Supplement: s1 [file s1]

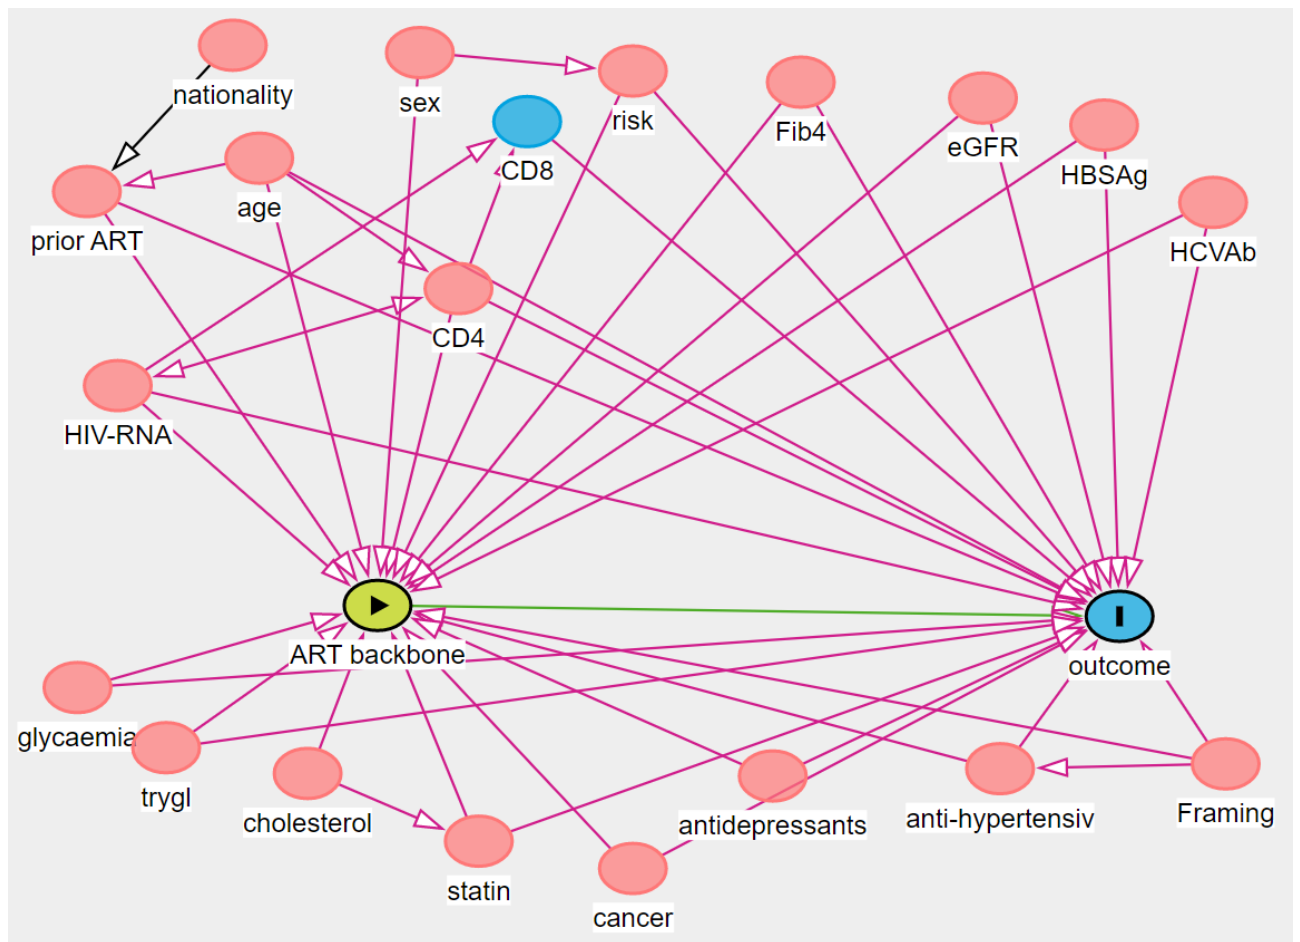

**Figure S1.** Directed acyclic graph representing causal dependencies among study variables, exposures and outcome(s).

**Table S1.** Characteristics of other previous cART regimens performed by experienced participants.

| <b>Other prior cART (N=68)</b> | <b>N°</b> | <b>%</b> |
|--------------------------------|-----------|----------|
| PI-boosted                     | 14        | 20.6%    |
| NRTI/INSTI/PI-boosted          | 13        | 19.1%    |
| NRTI/NNRTI/INSTI/PI-boosted    | 10        | 14.7%    |
| NRTI/NNRTI/PI-boosted          | 8         | 11.8%    |
| INSTI/PI-boosted               | 7         | 10.3%    |
| NRTI                           | 5         | 7.3%     |
| NNRTI/PI-boosted               | 3         | 4.4%     |
| Other                          | 8         | 11.8%    |

**Table S2.** Characteristics of experienced participants.

| <b>Characteristics of experienced participants (N=300)</b> | <b>N° or Median</b> | <b>% or (IQR)</b> |
|------------------------------------------------------------|---------------------|-------------------|
| <b>Age (years)</b>                                         | 54                  | (47-58)           |
| <b>Female sex</b>                                          | 77                  | 25.7%             |
| <b>Country (Italy)</b>                                     | 255                 | 85.0%             |
| <b>Year of starting DTG</b>                                |                     |                   |
| 2018                                                       | 19                  | 6.3%              |
| 2019                                                       | 239                 | 79.7%             |
| 2020                                                       | 39                  | 13.0%             |
| 2021                                                       | 3                   | 1.0%              |
| <b>cART backbone</b>                                       |                     |                   |
| XTC/TFX                                                    | 38                  | 12.7%             |
| 3TC                                                        | 96                  | 32.0%             |
| XTC/ABC                                                    | 113                 | 37.7%             |
| RPV                                                        | 35                  | 11.7%             |
| DRV/RTV                                                    | 18                  | 6.0%              |
| <b>Mode of transmission</b>                                |                     |                   |
| Other                                                      | 21                  | 7.0%              |
| MSM                                                        | 79                  | 26.3%             |
| IDU                                                        | 78                  | 26.0%             |
| Heterosexual                                               | 122                 | 40.7%             |
| <b>HBsAg chronic carriers</b>                              | 7                   | 2.3%              |
| <b>Positive HCV Ab participants</b>                        | 89                  | 29.7%             |
| <b>Prior/baseline cancer</b>                               | 24                  | 8.0%              |
| <b>Baseline HIV RNA Log<sub>10</sub> copies/mL</b>         | 1.7                 | (1.7-1.7)         |
| <b>Baseline CD4 T-cells/mm<sup>3</sup></b>                 | 700                 | (536-897)         |
| <b>Baseline CD8 T-cells/mm<sup>3</sup></b>                 | 808                 | (589-1114)        |
| <b>Baseline CD4/CD8 ratio</b>                              | 0.83                | (0.59-1.18)       |
| <b>Baseline FIB-4 score</b>                                | 1.08                | (0.76-1.55)       |
| <b>Baseline eGFR (ml/min)</b>                              | 90.38               | (76.27-101.87)    |
| <b>Baseline Framingham score</b>                           | 13                  | (10-15)           |
| <b>Death</b>                                               | 1                   | 0.3%              |
| <b>Total follow up time (days)</b>                         | 597.5               | (360.75-744)      |

**Table S3.** Characteristics of naïve participants.

| <b>Characteristics of naïve participants<br/>(N=71)</b> | <b>N° or Median</b> | <b>% or (IQR)</b> |
|---------------------------------------------------------|---------------------|-------------------|
| <b>Age (years)</b>                                      | 48                  | (39-55)           |
| <b>Female sex</b>                                       | 15                  | 21.1%             |
| <b>Country (Italy)</b>                                  | 54                  | 76.1%             |
| <b>Year of starting DTG</b>                             |                     |                   |
| 2018                                                    | 2                   | 2.8%              |
| 2019                                                    | 58                  | 81.7%             |
| 2020                                                    | 3                   | 4.2%              |
| 2021                                                    | 8                   | 11.3%             |
| <b>cART backbone</b>                                    |                     |                   |
| XTC/TFX                                                 | 42                  | 59.2%             |
| 3TC                                                     | 10                  | 14.1%             |
| XTC/ABC                                                 | 16                  | 22.5%             |
| RPV                                                     | 1                   | 1.4%              |
| DRV/RTV                                                 | 2                   | 2.8%              |
| <b>Mode of transmission</b>                             |                     |                   |
| Other                                                   | 4                   | 5.6%              |
| MSM                                                     | 23                  | 32.4%             |
| IDU                                                     | 2                   | 2.8%              |
| Heterosexual                                            | 42                  | 59.2%             |
| <b>HBsAg chronic carriers</b>                           | 0                   | 0.0%              |
| <b>Positive HCV Ab participants</b>                     | 6                   | 8.5%              |
| <b>Prior/baseline cancer</b>                            | 9                   | 12.7%             |
| <b>Baseline HIV RNA Log<sub>10</sub> copies/mL</b>      | 5.05                | (4.4-5.38)        |
| <b>Baseline CD4 T-cells/mm<sup>3</sup></b>              | 207                 | (54-463)          |
| <b>Baseline CD8 T-cells/mm<sup>3</sup></b>              | 805                 | (486-1092)        |
| <b>Baseline CD4/CD8 ratio</b>                           | 0.18                | (0.09-0.52)       |
| <b>Baseline FIB-4 score</b>                             | 1.01                | (0.62-1.54)       |
| <b>Baseline eGFR (ml/min)</b>                           | 100.3               | (86.38-109.41)    |
| <b>Baseline Framingham score</b>                        | 9                   | (4-12)            |
| <b>Death</b>                                            | 0                   | 0.0%              |
| <b>Total follow up time (days)</b>                      | 363                 | (252-645)         |
